# Supplementary material for: Profiling of the Polyphenol Content of Honey from Different Geographical Origins in the United States
Source: MDPI journal article supplement (doi:10.3390/molecules28135011), 2023-06-27
Supplement: s1 [file s1]

# **Profiling of the Polyphenol Content of Honey from Different Geographical Origins in the United States**

Kate Nyarko <sup>1</sup>, Kaitlyn Boozer <sup>1</sup> and C. Michael Greenlief <sup>1,\*</sup>

<sup>1</sup>Department of Chemistry, University of Missouri, 601 S. College Avenue, Columbia, MO 65211, USA; knzhb@mail.missouri.edu (K.N.); kboozer@mail.missouri.edu (K.B.)

\* Correspondence: greenliefm@missouri.edu; Tel.: +1-573-882-3288

## Contents

Table S1: Characteristic retention times, exact mass, molecular mass, and fragment masses of identified phenolic compounds in honey.

**Supplementary Table S1.** Characteristic retention times, exact mass, molecular mass, and fragment masses of identified phenolic compounds in honey.

| Compound                                   | Retention time (min) | Molecular mass (Da) | Measured mass [M-H] <sup>-</sup> , (Da) | Mass fragments (MS <sup>2</sup> ), 1 <sup>st</sup> , (Da) | Mass fragments (MS <sup>2</sup> ), 2 <sup>nd</sup> , (Da) | Collision energy (eV) | Sample origin            |
|--------------------------------------------|----------------------|---------------------|-----------------------------------------|-----------------------------------------------------------|-----------------------------------------------------------|-----------------------|--------------------------|
| <i>Phenolic acids</i>                      |                      |                     |                                         |                                                           |                                                           |                       |                          |
| Sinapic acid                               | 1.32                 | 224.0684            | 223.04                                  | 178.68                                                    | 186.86                                                    | 35                    | All origins              |
| Caffeic acid                               | 1.45                 | 180.0422            | 178.96                                  | 150.87                                                    | 134.85                                                    | 35                    | All origins              |
| 5,5-dihydroferulic acid                    | 1.50                 | 386.100             | 385.12                                  | 340.65                                                    | 236.87                                                    | 35                    | All origins              |
| Ferulic acid                               | 1.18                 | 194.0579            | 193.03                                  | 134.85                                                    | 98.20                                                     | 35                    | Utah                     |
| <i>Flavonoids</i>                          |                      |                     |                                         |                                                           |                                                           |                       |                          |
| Myricetin                                  | 5.20                 | 318.0375            | 316.63                                  | 151.73                                                    | 179.12                                                    | 40                    | Colorado/Texas/Idaho     |
| Quercetin 3-O-(6"-malonyl-glucoside)       | 12.49                | 550.0958            | 548.96                                  | 301.88                                                    | 256.14                                                    | 40                    | All origins              |
| Isorhamnetin                               | 7.38                 | 316.0583            | 315.01                                  | 150.95                                                    | 162.57                                                    | 40                    | Washington               |
| Quercetin                                  | 7.95                 | 302.0426            | 301.10                                  | 201.32                                                    | 153.27                                                    | 40                    | Washington               |
| (+)-Catechin 3-O-glucose                   | 8.08                 | 452.1318            | 451.02                                  | 199.68                                                    | 254.12                                                    | 40                    | Colorado/Texas           |
| Kaempferol                                 | 8.70                 | 286.0477            | 285.19                                  | 153.04                                                    | 213.20                                                    | 40                    | All origins              |
| Naringenin                                 | 6.83                 | 272.0684            | 271.13                                  | 148.89                                                    | 153.23                                                    | 40                    | Colorado/Utah/Washington |
| Chrysin                                    | 11.60                | 254.0579            | 253.20                                  | 143.55                                                    | 120.42                                                    | 40                    | Colorado                 |
| Apigenin                                   | 9.54                 | 270.0528            | 269.22                                  | 152.07                                                    | 182.08                                                    | 40                    | Washington               |
| Pinocembrin                                | 10.75                | 256.0735            | 255.21                                  | 153.22                                                    | 171.62                                                    | 40                    | Washington/Colorado/Utah |
| <i>Other flavonoids and phenolic acids</i> |                      |                     |                                         |                                                           |                                                           |                       |                          |
| 6-phrenylnarigenin                         | 10.09                | 340.1310            | 338.85                                  | 219.97                                                    | 120.68                                                    | 40                    | Utah                     |
| Hesperidin                                 | 11.05                | 610.1897            | 609.57                                  | 304.03                                                    | 195.51                                                    | 40                    | Idaho                    |
| Kaempferol 3-O-rhamnoside                  | 15.03                | 431.0983            | 429.98                                  | 287.17                                                    | 128.62                                                    | 40                    | Utah                     |
| Subaphyllin                                | 7.75                 | 264.1473            | 263.03                                  | 179.25                                                    | 152.11                                                    | 40                    | Utah                     |
